# Supplementary material for: Significant benefits of adding neoadjuvant chemotherapy before concurrent chemoradiotherapy for locoregionally advanced nasopharyngeal carcinoma: a meta-analysis of randomized controlled trials
Source: PubMed Central journal article supplement (PMC5217024; doi:10.18632/oncotarget.10237), 2016-06-23
Supplement: oncotarget-07-48375-s001.pdf [file oncotarget-07-48375-s001.pdf]

# Significant benefits of adding neoadjuvant chemotherapy before concurrent chemoradiotherapy for locoregionally advanced nasopharyngeal carcinoma: a meta-analysis of randomized controlled trials

## SUPPLEMENTARY FIGURES AND TABLES

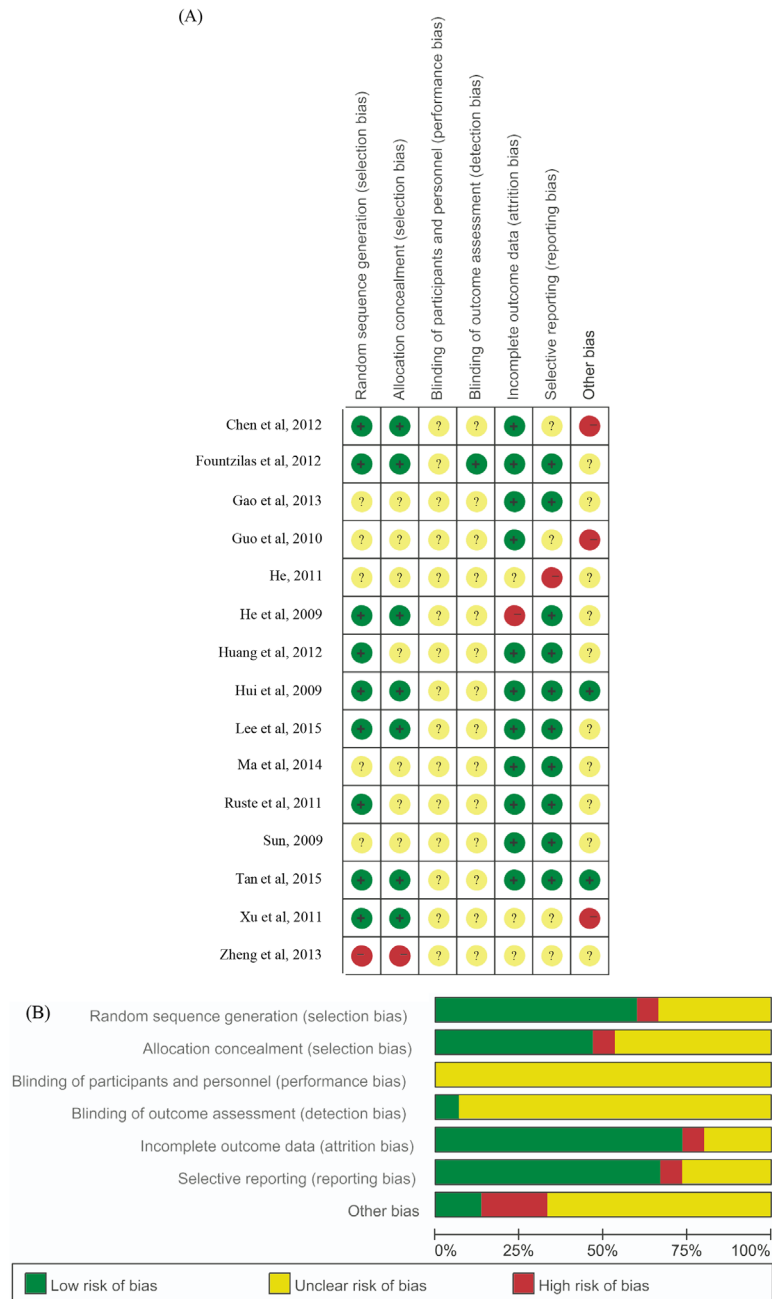

**Supplementary Figure S1:** Risk of bias summary by study A. and by domain B. 6 trials were graded as high risk of bias, and were excluded from this meta-analysis [21-26].

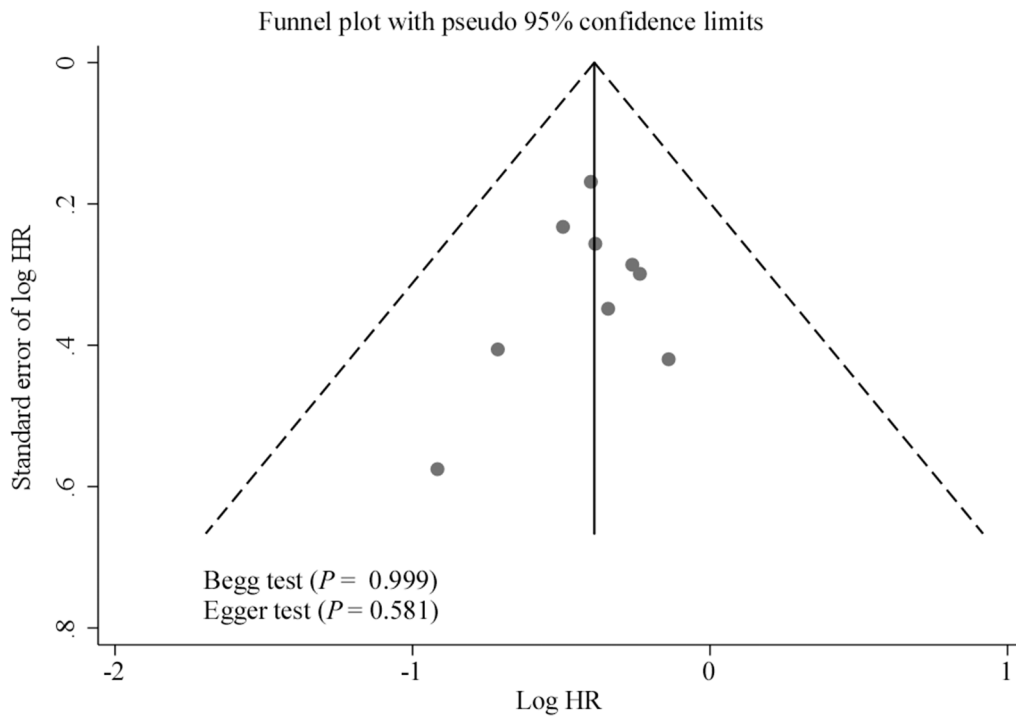

**Supplementary Figure S2: Funnel plot for publication bias in meta-analysis of the effect of neoadjuvant chemotherapy on progression-free survival for locoregionally advanced nasopharyngeal carcinoma.**

**Supplementary Table S1: Description of trials excluded from the meta-analysis.**

**See Supplementary File 1**

**Supplementary Table S2: The influence of the radiotherapy fractionation (conventional and accelerated) in Lee's trial [13]<sup>a</sup> on the meta-analysis of progression-free survival and overall survival**

| Factor                                  | PFS                 |                |                |                | OS                  |                |                |                |
|-----------------------------------------|---------------------|----------------|----------------|----------------|---------------------|----------------|----------------|----------------|
|                                         | HR<br>(95%CI)       | <i>P</i> value | I <sup>2</sup> | <i>P</i> value | HR<br>(95%CI)       | <i>P</i> value | I <sup>2</sup> | <i>P</i> value |
| Excluding Lee's trial [13] <sup>a</sup> | 0.60<br>(0.32-0.87) | <0.001         | 24.6           | 0.249          | 0.70<br>(0.50-0.98) | 0.040          | 0.0            | 0.420          |
| Including Lee's trial [13] <sup>a</sup> |                     |                |                |                |                     |                |                |                |
| Unadjusted                              |                     |                |                |                |                     |                |                |                |
| Conventional group <sup>b</sup>         | 0.65<br>(0.51-0.83) | <0.001         | 0.0            | 0.919          | 0.69<br>(0.52-0.93) | 0.013          | 0.0            | 0.545          |
| Accelerated group <sup>c</sup>          | 0.70<br>(0.55-0.90) | 0.005          | 0.0            | 0.717          | 0.73<br>(0.54-0.98) | 0.035          | 0.0            | 0.533          |
| Overall                                 | 0.70<br>(0.57-0.86) | 0.001          | 0.0            | 0.815          | 0.71<br>(0.55-0.92) | 0.010          | 0.0            | 0.640          |
| Adjusted                                |                     |                |                |                |                     |                |                |                |
| Conventional group <sup>b</sup>         | 0.63<br>(0.50-0.81) | <0.001         | 0.0            | 0.924          | 0.66<br>(0.50-0.90) | 0.007          | 0.0            | 0.505          |
| Accelerated group <sup>c</sup>          | 0.69<br>(0.54-0.88) | 0.003          | 0.0            | 0.792          | 0.71<br>(0.53-0.97) | 0.029          | 0.0            | 0.545          |
| Overall                                 | 0.68<br>(0.56-0.81) | <0.001         | 0.0            | 0.975          | 0.64<br>(0.49-0.84) | 0.001          | 4.7            | 0.467          |

<sup>a</sup> Patients in Lee's trial[13] were allocated to 6 arms: arm 1A (conventional fractionation radiotherapy, adjuvant chemotherapy[AC]), arm 2A (conventional fractionation radiotherapy, neoadjuvant chemotherapy[NACT]), arm 3A (conventional fractionation radiotherapy, NACT), arm 1B (accelerated fractionation radiotherapy, AC), arm 2B (accelerated fractionation radiotherapy, NACT), arm 3B (accelerated fractionation radiotherapy, NACT).

<sup>b</sup> Conventional group: Arms 2-3A vs 1A

<sup>c</sup> Accelerated group: Arms 2-3B vs 1B

CI, confidence interval; HR, hazard ratio; overall survival; PFS, progression-free survival.
